# Supplementary material for: Ultrafast resonance energy transfer in the umbelliferone–alizarin bichromophore
Source: Royal Society of Chemistry journal article supplement (doi:10.1039/c3cp54609h), 2014-01-01
Supplement: c3cp54609h.pdf [file c3cp54609h.pdf]

## Supporting Information

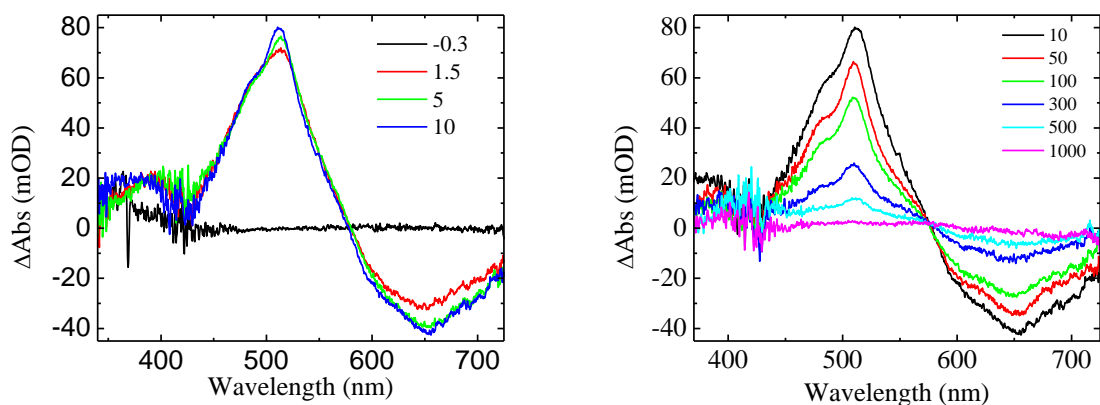

**Fig S1.** Transient Spectra at selected delays (ps) of isolated *Ac*,  $\lambda_{\text{exc}} = 330$  nm.

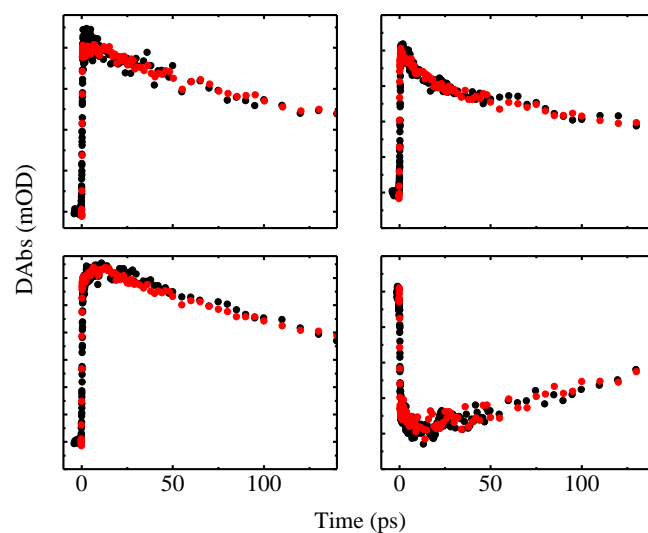

**Fig S2.** Kinetic traces of isolated *Ac*, with  $\lambda_{\text{exc}} = 330$  nm (*black scatter*) and with  $\lambda_{\text{exc}} = 400$  nm (*red scatter*).

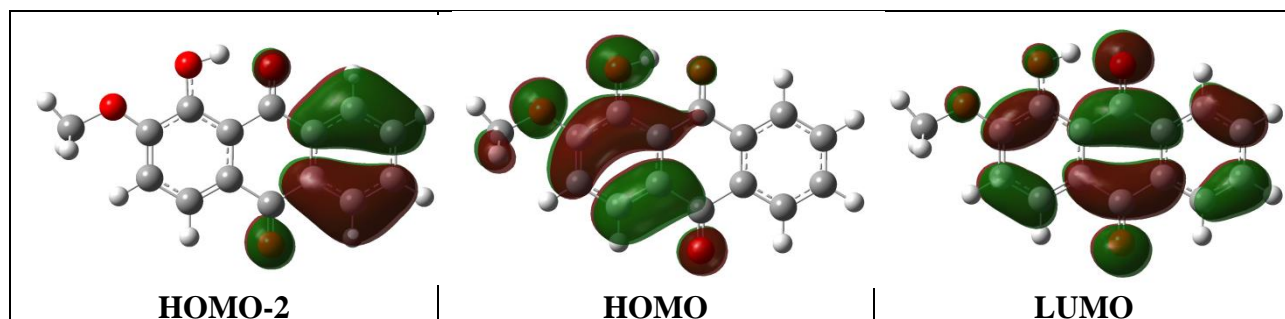

**Fig S3:** 3D plots of MO of interest of *Ac*.

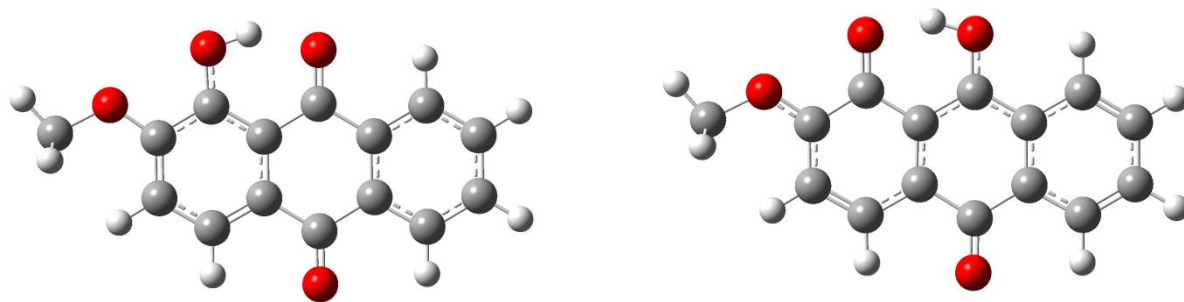

**Fig S4:** Ground electronic state (on the left) and first excited state (on the right) of *Ac*.

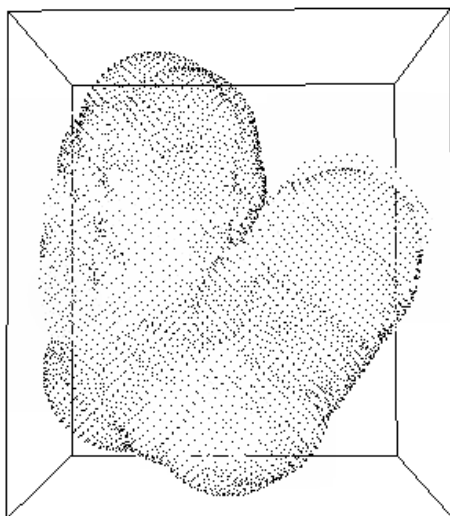

**Figure S5:** PCM cavity for the AAC conformation: solvent-accessible-surface (SAS).

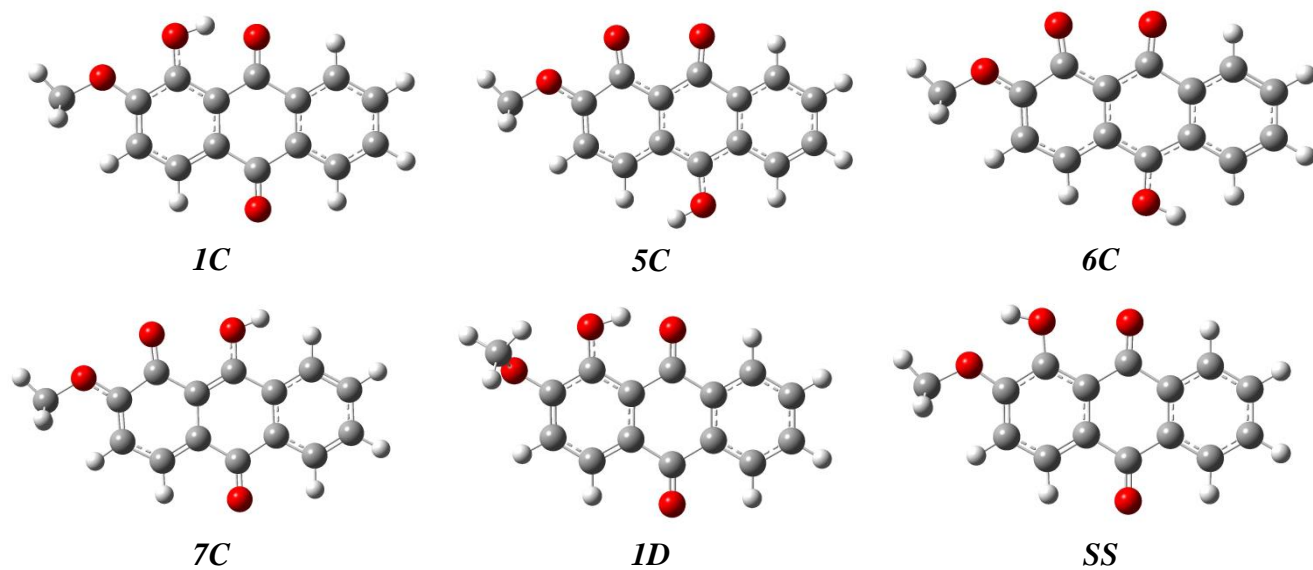

**Figure S6.** Relevant conformations of *Ac*

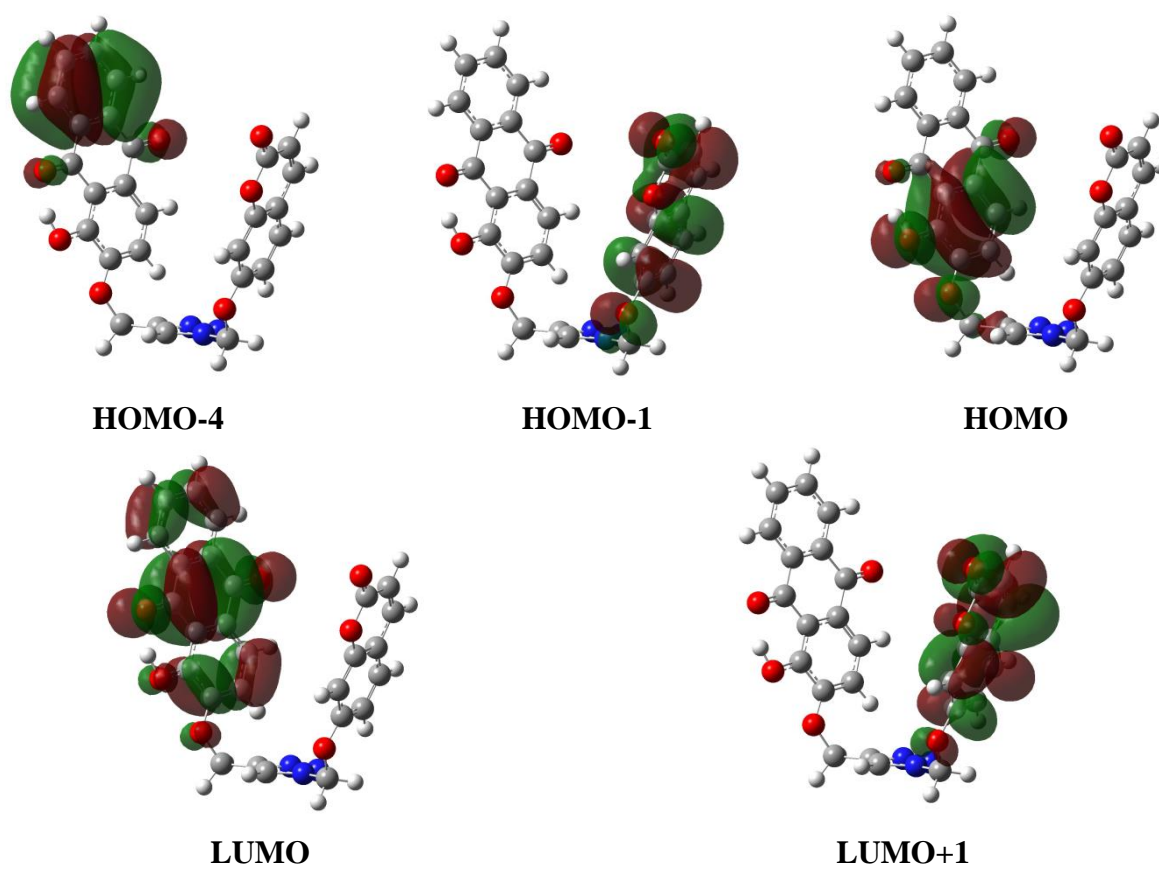

**Figure S7:** 3D plots of relevant MO of AAC.

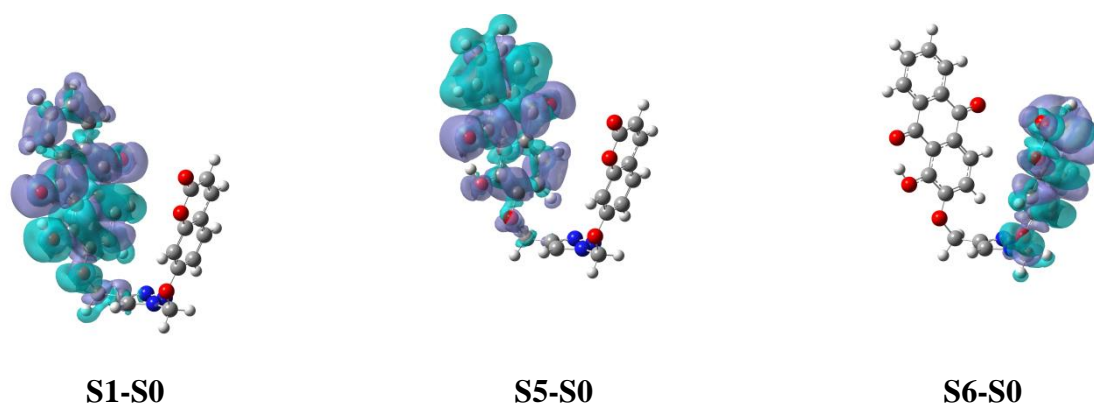

**Figure S8:** 3D plots of the electron density difference between the ground S0 and the first S1 (left-side picture), the fifth S5 (central picture) and sixth S6 (right-side picture) electronic state for AAC conformer. The zones where the electron density grows are mapped in light blue.

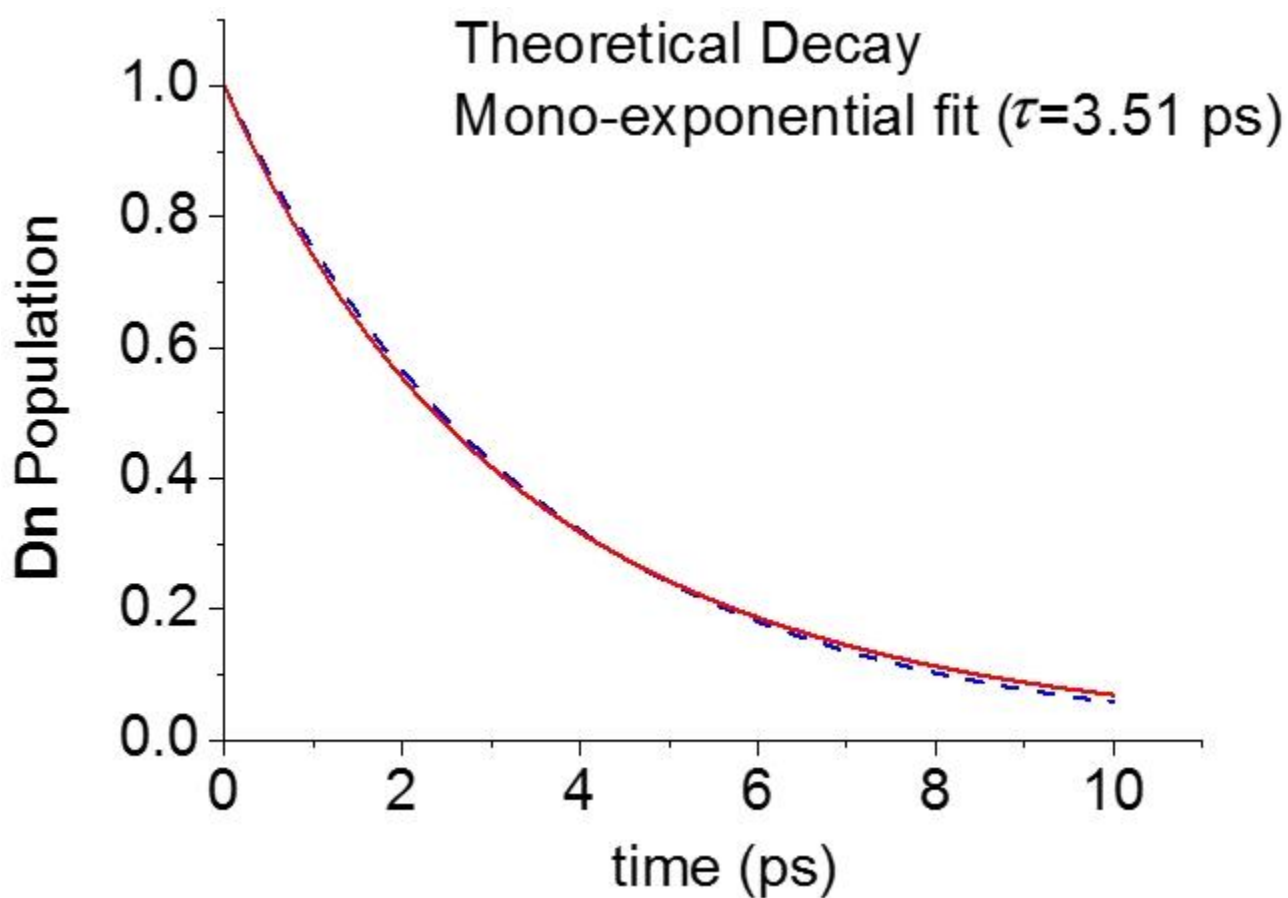

**Figure S9:** Theoretical *Dn* population decay due to the energy transfer, calculated assuming a weighted sum of exponential function (red line). The pre-exponential factors in the sum are the relative population of the conformers calculated by DFT approach. The dashed line is the mono-exponential fit, with a time constant of 3.51 ps.
